# Supplementary material
Source: publisher figshare collection journal article supplement (https://tandf.figshare.com/articles/dataset/_/18517907)
Supplement: Supplementary file 1 [file 1]

## Sheet: Sheet1
Table S1. Output for individual pairs of glasses measured.
Blue Light Source
Lens	Group	Circadian AUC1	Circadian Transmission2	Non-Circadian AUC3	Non-Circadian Transmission4	Total AUC5	Total Transmission6	Specificity7
Light Source	-	2357.12	-	121.073	-	2478.19	-	-
BLBG 1	RBL	2183.88	0.926505	91.4336	0.755192	2275.32	0.918136	-17.1313
BLBG 2		2091.18	0.887178	92.5814	0.764672	2183.77	0.881193	-12.2506
BLBG 3		2209.3	0.937287	102.468	0.846331	2311.77	0.932843	-9.09562
BLBG 4		2245.09	0.952472	99.5272	0.822041	2344.62	0.9461	-13.0431
BLBG 5		1993.14	0.845584	84.2817	0.696121	2077.43	0.838282	-14.9463
BLBG 6		2255.21	0.956763	91.6431	0.756922	2346.85	0.947	-19.9841
BLBG 7		2342.65	0.993862	74.4725	0.615102	2417.12	0.975357	-37.8759
BLBG 8		2011.35	0.853308	87.6758	0.724155	2099.02	0.846998	-12.9153
BLBG 9		2127.98	0.902789	86.6256	0.71548	2214.61	0.893638	-18.7309
BLBG 10		2241.51	0.950953	93.5178	0.772406	2335.03	0.94223	-17.8547
BLBG 11		2014.9	0.854813	84.8217	0.700581	2099.72	0.847278	-15.4232
BLBG 12		2257.4	0.957693	98.87	0.816613	2356.27	0.9508	-14.108
BLBG 13		2037.53	0.864414	40.4961	0.334476	2078.02	0.838524	-52.9938
BLBG 14		1786.7	0.758001	71.7136	0.592315	1858.41	0.749906	-16.5685
BLBG 15		2018.11	0.856177	87.1694	0.719972	2105.28	0.849523	-13.6205
BLBG 16		2194.3	0.930922	91.5058	0.755789	2285.8	0.922366	-17.5134
BLBG 17	YTL	1880.28	0.797704	77.4358	0.639578	1957.72	0.789979	-15.8126
BLBG 18		1139.22	0.48331	43.2611	0.357313	1182.48	0.477154	-12.5996
BLBG 19		1582.44	0.671344	72.8319	0.601552	1655.27	0.667934	-6.97912
BLBG 20		1517.13	0.643638	50.2772	0.415263	1567.41	0.63248	-22.8375
BLBG 21		1841.63	0.781305	82.6803	0.682894	1924.31	0.776497	-9.84107
BLBG 22		1004.47	0.426144	25.3603	0.209462	1029.83	0.415558	-21.6682
BLBG 23		849.236	0.360285	36.3386	0.300137	885.574	0.357347	-6.0148
BLBG 24	PTL	1717.65	0.728705	88.6278	0.732017	1806.27	0.728867	0.331215
BLBG 25		1432.17	0.607591	82.3619	0.680265	1514.53	0.611142	7.26737
BLBG 26		1090.97	0.462842	55.1308	0.455351	1146.1	0.462476	-0.749091
BLBG 27		336.693	0.142841	40.5778	0.33515	377.271	0.152236	19.2309
BLBG 28		374.433	0.158852	22.6433	0.187022	397.077	0.160228	2.81696
BLBG 29	BTL	584.253	0.247867	45.2314	0.373587	629.485	0.25401	12.5719
BLBG 30		1473.6	0.625172	57.0169	0.470929	1530.62	0.617636	-15.4243
BLBG 31		200.343	0.084995	19.55	0.161472	219.893	0.0887313	7.64774
BLBG 32		95.17	0.0403755	18.2253	0.150531	113.395	0.0457572	11.0155
BLBG 33		103.113	0.0437455	18.5622	0.153314	121.676	0.0490985	10.9568
BLBG 34	OTL	148.083	0.0628236	19.4567	0.160702	167.539	0.0676055	9.78779
BLBG 35		30.6133	0.0129876	18.3278	0.151377	48.9411	0.0197487	13.839
BLBG 36		39.3133	0.0166785	16.7469	0.138321	56.0603	0.0226214	12.1642
BLBG 37		160.606	0.0681364	20.0811	0.165859	180.687	0.0729106	9.77227
BLBG 38		15.82	0.00671158	20.6344	0.170429	36.4544	0.0147101	16.3718
BLBG 39		15.03	0.00637643	14.1869	0.117176	29.2169	0.0117896	11.08
BLBG 40	OBL	20.36	0.00863766	16.8506	0.139176	37.2106	0.0150152	13.0539
BLBG 41		37.3967	0.0158654	19.1025	0.157776	56.4992	0.0227985	14.1911
BLBG 42		93.1367	0.0395129	10.9031	0.0900533	104.04	0.0419821	5.05404
BLBG 43		29.61	0.0125619	11.9158	0.0984183	41.5258	0.0167565	8.58564
BLBG 44		126.293	0.0535795	13.5531	0.111941	139.846	0.0564308	5.83614
BLBG 45		21.94	0.00930797	18.2758	0.150948	40.2158	0.0162279	14.164
BLBG 46	RTL	16.99	0.00720795	17.7967	0.146991	34.7867	0.0140371	13.9783
BLBG 47		14.83	0.00629158	19.0225	0.157116	33.8525	0.0136602	15.0824
BLBG 48		31.86	0.0135165	18.5622	0.153314	50.4222	0.0203464	13.9797
BLBG 49		6.40333	0.00271659	7.33333	0.0605694	13.7367	0.00554302	5.78528
BLBG 50		3.13333	0.00132931	7.22167	0.059647	10.355	0.00417845	5.83177
Tablet Light
Lens	Group	Circadian AUC	Circadian Transmission	Non-Circadian AUC	Non-Circadian Transmission	Total AUC	Total Transmission	Specificity
Light Source	-	67.78	-	110.977	-	178.757	-	-
BLBG 1	RBL	62.7089	0.925183	100.278	0.903596	162.987	0.911781	-2.15869
BLBG 2		60.6467	0.894758	97.9131	0.882285	158.56	0.887014	-1.24725
BLBG 3		63.455	0.936191	102.226	0.921152	165.681	0.926854	-1.50385
BLBG 4		63.8356	0.941805	103.384	0.931587	167.22	0.935462	-1.0218
BLBG 5		60.9033	0.898544	98.5544	0.888065	159.458	0.892038	-1.04798
BLBG 6		64.1333	0.946198	97.5969	0.879437	161.73	0.904751	-6.67619
BLBG 7		67.4611	0.995295	96.44	0.869012	163.901	0.916895	-12.6284
BLBG 8		62.28	0.918855	98.6531	0.888953	160.933	0.900291	-2.9902
BLBG 9		62.3544	0.919953	97.8567	0.881777	160.211	0.896253	-3.81765
BLBG 10		64.7583	0.955419	104.505	0.941684	169.263	0.946892	-1.37351
BLBG 11		61.0933	0.901347	99.23	0.894152	160.323	0.89688	-0.719557
BLBG 12		64.3983	0.950108	103.373	0.931487	167.772	0.938548	-1.86211
BLBG 13		60.0983	0.886668	79.7331	0.718467	139.831	0.782244	-16.8201
BLBG 14		57.7033	0.851333	92.5831	0.834257	150.286	0.840732	-1.70758
BLBG 15		60.6756	0.895184	98.1797	0.884688	158.855	0.888668	-1.04958
BLBG 16		62.8333	0.927019	100.294	0.903739	163.127	0.912566	-2.32803
BLBG 17	YTL	57.25	0.844644	95.5594	0.861077	152.809	0.854846	1.64325
BLBG 18		52.07	0.768221	81.8436	0.737485	133.914	0.749139	-3.07359
BLBG 19		54.2533	0.800433	92.1047	0.829947	146.358	0.818756	2.9514
BLBG 20		52.8733	0.780073	85.4981	0.770415	138.371	0.774077	-0.965808
BLBG 21		57.8233	0.853103	92.1408	0.830272	149.964	0.838929	-2.2831
BLBG 22		42.9	0.63293	69.5039	0.626293	112.404	0.628809	-0.663725
BLBG 23		40.3233	0.594915	74.1478	0.668138	114.471	0.640374	7.32235
BLBG 24	PTL	48.34	0.71319	96.6053	0.870501	144.945	0.810852	15.7311
BLBG 25		41.2467	0.608537	87.185	0.785616	128.432	0.718472	17.7078
BLBG 26		19.4367	0.286761	74.0756	0.667488	93.5122	0.523126	38.0727
BLBG 27		7.89	0.116406	69.7708	0.628698	77.6608	0.43445	51.2292
BLBG 28		17.8767	0.263745	26.8017	0.241507	44.6783	0.249939	-2.22382
BLBG 29	BTL	20.8667	0.307859	67.6947	0.609991	88.5614	0.49543	30.2132
BLBG 30		43.17	0.636914	72.7339	0.655398	115.904	0.648389	1.84845
BLBG 31		5.12333	0.0755877	12.5589	0.113167	17.6822	0.0989178	3.75792
BLBG 32		5.89	0.0868988	24.6933	0.222509	30.5833	0.171089	13.561
BLBG 33		2.65	0.0390971	7.54472	0.0679848	10.1947	0.0570313	2.88877
BLBG 34	OTL	23.76	0.350546	68.0431	0.613129	91.8031	0.513564	26.2584
BLBG 35		5.44	0.0802597	64.9997	0.585706	70.4397	0.394054	50.5447
BLBG 36		6.23667	0.0920134	64.0169	0.57685	70.2536	0.393013	48.4837
BLBG 37		26.1433	0.385709	73.9292	0.666169	100.072	0.559825	28.046
BLBG 38		11.1433	0.164404	74.7125	0.673227	85.8558	0.480294	50.8823
BLBG 39		3.73	0.055031	37.6047	0.338853	41.3347	0.231235	28.3822
BLBG 40	OBL	6.24333	0.0921117	68.6689	0.618769	74.9122	0.419074	52.6657
BLBG 41		7.67	0.11316	64.1194	0.577774	71.7894	0.401604	46.4614
BLBG 42		19.8867	0.2934	74.0031	0.666834	93.8897	0.525238	37.3434
BLBG 43		13.18	0.194453	72.1711	0.650327	85.3511	0.477471	45.5874
BLBG 44		13.8267	0.203993	48.9833	0.441384	62.81	0.351372	23.7391
BLBG 45		11.0333	0.162782	72.0217	0.64898	83.055	0.464626	48.6199
BLBG 46	RTL	0.53	0.00781942	53.6814	0.483718	54.2114	0.303269	47.5898
BLBG 47		3.03667	0.0448018	65.4358	0.589636	68.4725	0.383049	54.4834
BLBG 48		1.35	0.0199174	37.2783	0.335911	38.6283	0.216095	31.5994
BLBG 49		0.566667	0.00836038	20.7942	0.187374	21.3608	0.119497	17.9014
BLBG 50		0.43	0.00634405	36.5461	0.329313	36.9761	0.206852	32.2969
Sunlight
Lens	Group	Circadian AUC	Circadian Transmission	Non-Circadian AUC	Non-Circadian Transmission	Total AUC	Total Transmission	Specificity
Light Source	-	4075.66	-	10415.1	-	14490.7	-	-
BLBG 1	RBL	3904.82	0.958084	8900.11	0.854541	12804.9	0.883663	-10.3544
BLBG 2		3685.91	0.904371	8725.04	0.837731	12411	0.856474	-6.664
BLBG 3		3765.67	0.923942	8617	0.827357	12382.7	0.854522	-9.65844
BLBG 4		3886.3	0.953541	8931.68	0.857571	12818	0.884564	-9.59692
BLBG 5		3656.94	0.897264	8764.08	0.841479	12421	0.857169	-5.5785
BLBG 6		3715.74	0.91169	7853.99	0.754098	11569.7	0.798422	-15.7593
BLBG 7		3929.99	0.96426	8257.08	0.7928	12187.1	0.841025	-17.146
BLBG 8		3228.77	0.792209	8019.19	0.769959	11248	0.776217	-2.22491
BLBG 9		3606.62	0.884917	8425.79	0.808999	12032.4	0.830352	-7.59178
BLBG 10		3628.22	0.890217	8322.84	0.799113	11951.1	0.824737	-9.11038
BLBG 11		3482.41	0.854441	8087.43	0.776511	11569.8	0.798429	-7.79307
BLBG 12		3586.31	0.879935	7984.92	0.766669	11571.2	0.798526	-11.3266
BLBG 13		3326.75	0.81625	6995.48	0.671668	10322.2	0.712333	-14.4582
BLBG 14		3096.19	0.759679	7520.69	0.722096	10616.9	0.732666	-3.7583
BLBG 15		3382.54	0.829937	8131.27	0.78072	11513.8	0.794563	-4.92173
BLBG 16		3381.73	0.82974	7551.46	0.72505	10933.2	0.754495	-10.4689
BLBG 17	YTL	3083.03	0.756451	7517.47	0.721787	10600.5	0.731536	-3.46641
BLBG 18		2952.99	0.724543	7625.11	0.732122	10578.1	0.72999	0.757938
BLBG 19		2916	0.715468	7734.56	0.74263	10650.6	0.734991	2.71628
BLBG 20		2853.95	0.700244	7444.06	0.714738	10298	0.710662	1.44945
BLBG 21		3138.17	0.769979	7525.17	0.722526	10663.3	0.735873	-4.74528
BLBG 22		2169.99	0.532427	6795.09	0.652427	8965.08	0.618676	12
BLBG 23		2157.54	0.529372	7018.19	0.673849	9175.73	0.633213	14.4476
BLBG 24	PTL	2705.68	0.663864	8091.29	0.776882	10797	0.745095	11.3017
BLBG 25		2162.03	0.530474	7019.22	0.673948	9181.25	0.633594	14.3474
BLBG 26		1566.03	0.384239	6669.93	0.640411	8235.96	0.56836	25.6172
BLBG 27		401.383	0.0984831	5843.84	0.561093	6245.22	0.43098	46.261
BLBG 28		541.133	0.132772	1096.09	0.10524	1637.22	0.112984	-2.75318
BLBG 29	BTL	2162.9	0.530687	5816.77	0.558495	7979.67	0.550673	2.7808
BLBG 30		370.207	0.0908336	2155.14	0.206925	2525.34	0.174273	11.6091
BLBG 31		216.977	0.0532372	1934.48	0.185739	2151.46	0.148471	13.2501
BLBG 32		932.727	0.228853	5933.84	0.569735	6866.57	0.473859	34.0882
BLBG 33		222.28	0.0545385	6400.08	0.614501	6622.36	0.457007	55.9963
BLBG 34	OTL	223.88	0.054931	5810.31	0.557874	6034.19	0.416417	50.2943
BLBG 35		1136.67	0.278892	6700.27	0.643324	7836.94	0.540824	36.4431
BLBG 36		466.617	0.114489	6550.49	0.628942	7017.11	0.484248	51.4454
BLBG 37		371.45	0.0911387	3740.45	0.359137	4111.9	0.28376	26.7999
BLBG 38		265.287	0.0650905	2213.48	0.212527	2478.77	0.171059	14.7436
BLBG 39		339.6	0.083324	6367.44	0.611367	6707.04	0.46285	52.8043
BLBG 40	OBL	359.43	0.0881895	6138.16	0.589353	6497.59	0.448396	50.1164
BLBG 41		779.037	0.191144	6479.19	0.622097	7258.23	0.500887	43.0953
BLBG 42		475.313	0.116623	6013.15	0.57735	6488.46	0.447766	46.0727
BLBG 43		535.57	0.131407	4245.91	0.40767	4781.48	0.329968	27.6262
BLBG 44		416.927	0.102297	5995.26	0.575633	6412.19	0.442502	47.3336
BLBG 45		919.22	0.225539	5277.19	0.506687	6196.41	0.427612	28.1148
BLBG 46	RTL	73.0533	0.0179243	5322.38	0.511026	5395.43	0.372336	49.3101
BLBG 47		320.567	0.078654	5956.22	0.571884	6276.79	0.433158	49.323
BLBG 48		268.5	0.065879	4158.25	0.399253	4426.75	0.305488	33.3374
BLBG 49		317.65	0.0779384	2967.66	0.284938	3285.31	0.226718	20.7
BLBG 50		104.923	0.0257439	3732.84	0.358407	3837.76	0.264842	33.2663
Room Light
Lens	Group	Circadian AUC	Circadian Transmission	Non-Circadian AUC	Non-Circadian Transmission	Total AUC	Total Transmission	Specificity
Light Source	-	141.153	-	204.547	-	345.7	-	-
BLBG 1	RBL	126.731	0.897826	171.87	0.840248	298.601	0.863758	-5.75775
BLBG 2		115.448	0.817889	159.143	0.778028	274.591	0.794304	-3.9861
BLBG 3		113.291	0.80261	155.26	0.759044	268.551	0.776833	-4.35659
BLBG 4		103.07	0.730199	142.179	0.695091	245.249	0.709426	-3.51075
BLBG 5		95.6467	0.677608	133.092	0.650668	228.739	0.661668	-2.69404
BLBG 6		90.1133	0.638407	120.532	0.589264	210.645	0.60933	-4.91436
BLBG 7		99.0367	0.701625	131.984	0.645252	231.021	0.66827	-5.63726
BLBG 8		102.47	0.725948	141.446	0.691509	243.916	0.705571	-3.44393
BLBG 9		109.317	0.774453	149.693	0.731827	259.009	0.749232	-4.26263
BLBG 10		105.407	0.746753	147.468	0.720951	252.875	0.731486	-2.58023
BLBG 11		104.537	0.740589	143.536	0.701729	248.073	0.717596	-3.88601
BLBG 12		115.322	0.817	153.091	0.748441	268.413	0.776434	-6.85586
BLBG 13		117.742	0.834144	157.194	0.768498	274.936	0.795302	-6.56466
BLBG 14		104.313	0.739007	146.685	0.717121	250.998	0.726057	-2.18862
BLBG 15		111.283	0.788386	154.25	0.754107	265.533	0.768103	-3.42795
BLBG 16		114.338	0.810025	157.696	0.770953	272.034	0.786907	-3.90725
BLBG 17	YTL	113.624	0.804972	161.281	0.788481	274.906	0.795214	-1.6491
BLBG 18		108.78	0.770651	151.613	0.741216	260.393	0.753235	-2.9435
BLBG 19		92.6833	0.656615	138.747	0.678313	231.43	0.669453	2.16985
BLBG 20		97.74	0.692438	137.326	0.671369	235.066	0.679972	-2.1069
BLBG 21		91.4633	0.647971	132.46	0.64758	223.924	0.64774	-0.039173
BLBG 22		79.4033	0.562532	123.539	0.603964	202.942	0.587047	4.14319
BLBG 23		78.5133	0.556227	129.776	0.634459	208.29	0.602516	7.82313
BLBG 24	PTL	91.83	0.650569	160.047	0.782446	251.877	0.728599	13.1877
BLBG 25		67.35	0.477141	140.334	0.686071	207.684	0.600763	20.8931
BLBG 26		39.5467	0.280168	126.492	0.6184	166.038	0.480296	33.8232
BLBG 27		12.5867	0.0891702	89.8333	0.439183	102.42	0.296268	35.0012
BLBG 28		32.47	0.230034	42.8225	0.209353	75.2925	0.217797	-2.06803
BLBG 29	BTL	53.2433	0.377202	83.4478	0.407964	136.691	0.395404	3.07624
BLBG 30		23.4533	0.166155	44.0294	0.215254	67.4828	0.195206	4.90988
BLBG 31		30.3833	0.215251	66.6167	0.32568	97	0.28059	11.0429
BLBG 32		32.6367	0.231214	106.096	0.518686	138.732	0.401308	28.7472
BLBG 33		15.62	0.11066	122.558	0.599168	138.178	0.399704	48.8508
BLBG 34	OTL	39.7967	0.281939	129.352	0.632386	169.149	0.489295	35.0447
BLBG 35		61.9667	0.439003	142.921	0.698721	204.888	0.592675	25.9719
BLBG 36		40.8667	0.28952	122.77	0.600204	163.636	0.473348	31.0684
BLBG 37		28.2933	0.200444	75.0967	0.367137	103.39	0.299074	16.6693
BLBG 38		34.3	0.242998	87.7803	0.429145	122.08	0.353139	18.6147
BLBG 39		33.6833	0.238629	122.273	0.597777	155.957	0.451133	35.9148
BLBG 40	OBL	34.29	0.242927	124.554	0.608928	158.844	0.459486	36.6001
BLBG 41		34.88	0.247107	117.213	0.57304	152.093	0.439958	32.5932
BLBG 42		28.1367	0.199334	96.2672	0.470637	124.404	0.359861	27.1303
BLBG 43		33.8367	0.239716	101.3	0.49524	135.136	0.390907	25.5524
BLBG 44		34.2333	0.242526	120.116	0.587231	154.349	0.446484	34.4705
BLBG 45		25.4667	0.180418	104.756	0.512139	130.223	0.376694	33.1721
BLBG 46	RTL	7.21333	0.0511028	94.6325	0.462645	101.846	0.294608	41.1542
BLBG 47		20.1233	0.142564	111.219	0.543735	131.343	0.379932	40.1171
BLBG 48		33.8933	0.240117	88.9667	0.434946	122.86	0.355395	19.4828
BLBG 49		34.8933	0.247202	80.3069	0.392609	115.2	0.333238	14.5408
BLBG 50		25.37	0.179734	71.3037	0.348594	96.6737	0.279646	16.886
Lamp Light
Lens	Group	Circadian AUC	Circadian Transmission	Non-Circadian AUC	Non-Circadian Transmission	Total AUC	Total Transmission	Specificity
Light Source	-	33.5933	-	148.947	-	182.54	-	-
BLBG 1	RBL	30.6756	0.913144	136.733	0.918	167.409	0.917106	0.485596
BLBG 2		29.2733	0.871403	135.792	0.911684	165.066	0.904271	4.02805
BLBG 3		30.0206	0.893646	131.331	0.881732	161.352	0.883925	-1.19138
BLBG 4		30.1639	0.897913	133.215	0.894379	163.379	0.895029	-0.353427
BLBG 5		29.2533	0.870808	139.521	0.936717	168.774	0.924587	6.5909
BLBG 6		29.02	0.863862	121.321	0.814523	150.341	0.823603	-4.93384
BLBG 7		32.3944	0.964312	138.455	0.929559	170.849	0.935955	-3.47527
BLBG 8		28.9089	0.860554	129.408	0.868821	158.317	0.8673	0.826708
BLBG 9		29.7078	0.884336	131.031	0.879718	160.739	0.880568	-0.46172
BLBG 10		30.6967	0.913773	134.614	0.903771	165.31	0.905611	-1.0002
BLBG 11		29.6922	0.883872	136.467	0.916213	166.159	0.910262	3.2341
BLBG 12		29.4467	0.876563	126.458	0.849016	155.905	0.854085	-2.75471
BLBG 13		29.1744	0.868459	129.671	0.870588	158.846	0.870196	0.212818
BLBG 14		27.58	0.820996	131.045	0.87981	158.625	0.868986	5.88135
BLBG 15		29.2189	0.869782	134.47	0.902808	163.689	0.89673	3.30259
BLBG 16		29.6722	0.883277	130.349	0.875138	160.021	0.876636	-0.81391
BLBG 17	YTL	27.4833	0.818119	132.689	0.890846	160.172	0.877462	7.27278
BLBG 18		27.8289	0.828405	142.361	0.955788	170.19	0.932345	12.7383
BLBG 19		25.3667	0.75511	128.333	0.861606	153.7	0.842007	10.6496
BLBG 20		24.64	0.733479	128.366	0.861824	153.006	0.838204	12.8345
BLBG 21		27.42	0.816233	129.791	0.871389	157.211	0.861239	5.51561
BLBG 22		21.3567	0.635741	130.431	0.875692	151.788	0.831533	23.9951
BLBG 23		20.0267	0.59615	123.213	0.827227	143.239	0.784702	23.1077
BLBG 24	PTL	22.93	0.682576	131.923	0.885709	154.853	0.848325	20.3133
BLBG 25		19.3033	0.574618	121.366	0.814826	140.669	0.77062	24.0208
BLBG 26		14.38	0.428061	123.495	0.829122	137.875	0.755314	40.1061
BLBG 27		4.1	0.122048	115.684	0.77668	119.784	0.656206	65.4632
BLBG 28		4.73333	0.140901	14.86	0.0997673	19.5933	0.107337	-4.11337
BLBG 29	BTL	10.2	0.303632	108.569	0.728911	118.769	0.650646	42.5279
BLBG 30		19.4567	0.579182	99.6503	0.669033	119.107	0.652498	8.98509
BLBG 31		3.46667	0.103195	35.9697	0.241494	39.4364	0.216042	13.8299
BLBG 32		1.95333	0.0581465	35.1172	0.23577	37.0706	0.203082	17.7624
BLBG 33		1.78667	0.0531852	29.6044	0.198759	31.3911	0.171968	14.5574
BLBG 34	OTL	11.08	0.329827	120.641	0.809958	131.721	0.721598	48.0131
BLBG 35		2.60333	0.0774955	126.428	0.848812	129.031	0.706865	77.1317
BLBG 36		3.27	0.0973407	120.772	0.81084	124.042	0.679533	71.3499
BLBG 37		11.31	0.336674	129.134	0.866981	140.444	0.769387	53.0307
BLBG 38		5.74333	0.170966	135.391	0.908991	141.134	0.77317	73.8024
BLBG 39		1.88667	0.0561619	65.0378	0.436651	66.9244	0.366629	38.049
BLBG 40	OBL	3.52333	0.104882	118.355	0.794611	121.878	0.667679	68.9729
BLBG 41		3.37	0.100318	115.571	0.775921	118.941	0.651588	67.5603
BLBG 42		8.56	0.254812	128.603	0.863419	137.163	0.751415	60.8606
BLBG 43		5.83333	0.173646	122.564	0.822873	128.397	0.703394	64.9227
BLBG 44		5.85667	0.17434	82.7453	0.555536	88.6019	0.485384	38.1196
BLBG 45		4.83	0.143779	123.035	0.826034	127.865	0.700477	68.2255
BLBG 46	RTL	0.473333	0.0140901	106.954	0.718066	107.427	0.588512	70.3976
BLBG 47		1.68667	0.0502084	120.113	0.806417	121.8	0.667249	75.6208
BLBG 48		1.44667	0.0430641	80.8233	0.542633	82.27	0.450696	49.9569
BLBG 49		0.196667	0.00585434	56.3783	0.378514	56.575	0.309932	37.2659
BLBG 50		0.12	0.00357214	74.1242	0.497656	74.2442	0.406728	49.4084
1Circadian AUC: the area under the cuve measured from wavelengths 455-560nm
2Circadian Transmission = (Irradiance_Lens/Irradiance_(Light Source) )*100 measured between 455-560nm
3Non-Circadian AUC: the area under the cuve measured from wavelengths 380-454 and 561-780nm
4Non-Circadian Transmission = (Irradiance_Lens/Irradiance_(Light Source) )*100 measured between 380-454 and 561-780nm
5Total AUC: the area under the cuve measured from wavelengths 380-780nm
6Total Transmission = (Irradiance_Lens/Irradiance_(Light Source) )*100 measured between 380-780nm
7Specificity = Percent of non-circadian light (380-454 & 561-780 nm) - Percent of circadian-active light (455-560 nm)
